# Supplementary material for: Peloplasma aerotolerans gen. nov., sp. nov., a Novel Anaerobic Free-Living Mollicute Isolated from a Terrestrial Mud Volcano
Source: MDPI journal article supplement (doi:10.3390/life14050563), 2024-04-26
Supplement: s1 [file s1]

***Peloplasma aerotolerans* gen. nov., sp. nov., a novel anaerobic free-living mollicute isolated from a terrestrial mud volcano**

Maria A. Khomyakova<sup>1\*</sup>, Alexander Y. Merkel<sup>1</sup>, Andrei A. Novikov<sup>2</sup>, Alexander I. Slobodkin<sup>1</sup>

<sup>1</sup>Winogradsky Institute of Microbiology, Research Center of Biotechnology of the Russian Academy of Sciences, Leninskiy Prospekt, 33, bld. 2, 119071, Moscow, Russia

<sup>2</sup>Gubkin University, Leninskiy Prospekt, 65/1, 119991, Moscow, Russia

\* Author for correspondence: Maria Khomyakova. Tel: +7 499 135 8101.  
e-mail: mary\_klimova@mail.ru

**Supplementary Table S1.** The cellular fatty acid profile of M4Ah<sup>T</sup> strain.

| Name                   | ECL (HP-5MS) | Strain M4Ah |
|------------------------|--------------|-------------|
| i-C <sub>14:0</sub>    | 13.647       | 1.7         |
| C <sub>14:0</sub>      | 14.000       | 2.7         |
| i-C <sub>15:0</sub>    | 14.635       | 5.1         |
| ai-C <sub>15:0</sub>   | 14.692       | 4.5         |
| i-C <sub>16:0</sub>    | 15.632       | 1.9         |
| C <sub>16:0</sub>      | 16.000       | 35.1        |
| ai-C <sub>17:0</sub>   | 16.718       | ND          |
| C <sub>17:0</sub>      | 17.000       | 0.8         |
| 3-OH C <sub>16:0</sub> | 17.508       | 1.8         |
| C <sub>18:1</sub> ω9c  | 17.762       | 6.9         |
| C <sub>18:1</sub> ω7c  | 17.816       | 2.3         |
| C <sub>18:0</sub>      | 18.000       | 29.1        |
| 3-OH C <sub>18:0</sub> | 19.538       | 4.1         |
| C <sub>22:1</sub>      | 21.778       | 4.0         |

**Supplementary Table S2.** Distribution of bacterial clones species-related to M4Ah<sup>T</sup> isolate in environmental and artificial habitats. Blastn with the identity>94.5% and alignment length ≥1 300 bp, was used in order to align the metagenomic quality-filtered shotgun reads against strain M4Ah<sup>T</sup> genome.

| Database name                         | GenBank accession number | Source                                       | 16S rRNA sequence similarity, % | Reference   |
|---------------------------------------|--------------------------|----------------------------------------------|---------------------------------|-------------|
| Stn1_Nov_17                           | KX014197.1               | Surface water of mangrove creek, India       | 96.26                           | 44          |
| EMIRGE_OTU_s3t2d_423                  | JX222651.1               | Subsurface aquifer sediment, USA             | 96.12                           | Unpublished |
| EV818CFSSAHH219                       | DQ337019.1               | Subsurface water, South Africa               | 95.99                           | 45          |
| B98                                   | AB874577.1               | Anaerobic reactor treating corn straw, China | 96.47                           | 46          |
| FGL12_B14                             | FJ437874.1               | Lake sediment, USA                           | 95.58                           | 47          |
| MZ-XQ                                 | CP017950.1               | Deep seafloor coal bed, Japan                | 95.58                           | Unpublished |
| Ach1                                  | MW599757.1               | Cold seep sediment, China                    | 95.51                           | Unpublished |
| TANB25                                | AY667255.1               | TCE-dechlorinating groundwater, USA          | 95.77                           | 48          |
| zrk7                                  | OP108612.1               | Cold seep, China                             | 95.24                           | Unpublished |
| XX0065                                | FJ820457.1               | Hypertrophic freshwater lake, China          | 95.04                           | Unpublished |
| CK06-06_Mud_MAS1B-28                  | AB369171.1               | Riser drilling mud fluid, Japan              | 95.50                           | 49          |
| e871f63d-8a2d-4cdd-b754-05539c673417* | OY764060.1               | Ciliate metagenome, UK                       | 94.76                           | Unpublished |

|            |            |                                                   |       |             |
|------------|------------|---------------------------------------------------|-------|-------------|
| SAW1_B33   | FJ716289.1 | Water column,<br>at 10.3 m<br>water depth,<br>USA | 94.64 | Unpublished |
| B-6        | HQ703858.1 | Lake sediment,<br>China                           | 95.01 | 50          |
| HJ1A286    | KC852988.1 | Soda lake<br>sediment,<br>Mongolia                | 96.18 | 51          |
| BF65B_B15  | HM141299.1 | Supraglacial<br>spring outflow,<br>USA            | 96.54 | 52          |
| 2P9SHNG554 | FJ469288.1 | Oil well, USA                                     | 95.95 | 53          |

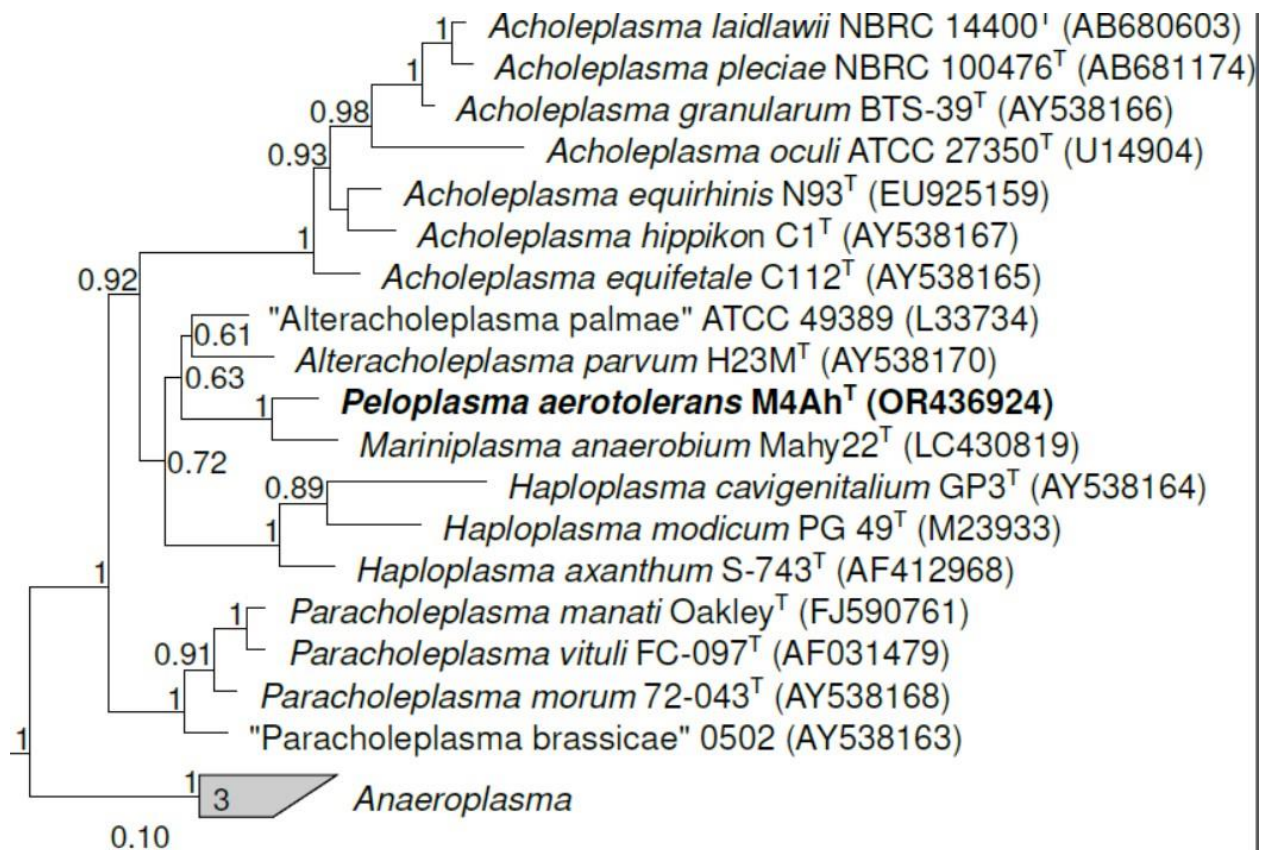

**Supplementary Figure 1.** Phylogenetic placement of *Peloplasma aerotolerans* M4Ah<sup>T</sup> based on 16S rRNA gene sequence. The tree was built using the IQ-TREE program [28] and the ultrafast approximation for phylogenetic bootstrap [30]. Bootstrap values above 70% are shown at the nodes. Bar, 0.10 changes per position.
